# Supplementary material
Source: Springer Nature journal article supplement (https://www.springermedizin.de/resource/supplementary/12957_2012_1142_MOESM5_ESM.pdf/9561872)

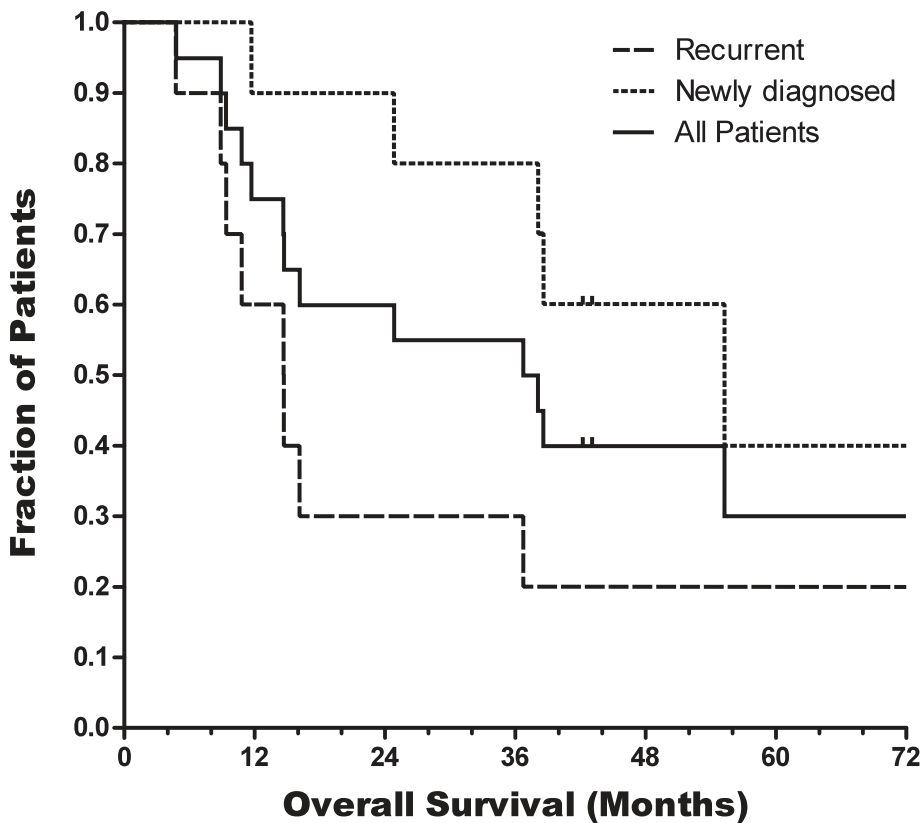

Supplement: MOESM5 [file 9561872]
